# Supplementary material
Source: Springer Nature journal article supplement (https://www.springermedizin.de/resource/supplementary/12937_2009_276_MOESM1_ESM.pdf/25654766)

**Panel A. Main Sources of n-3 FA in boys**

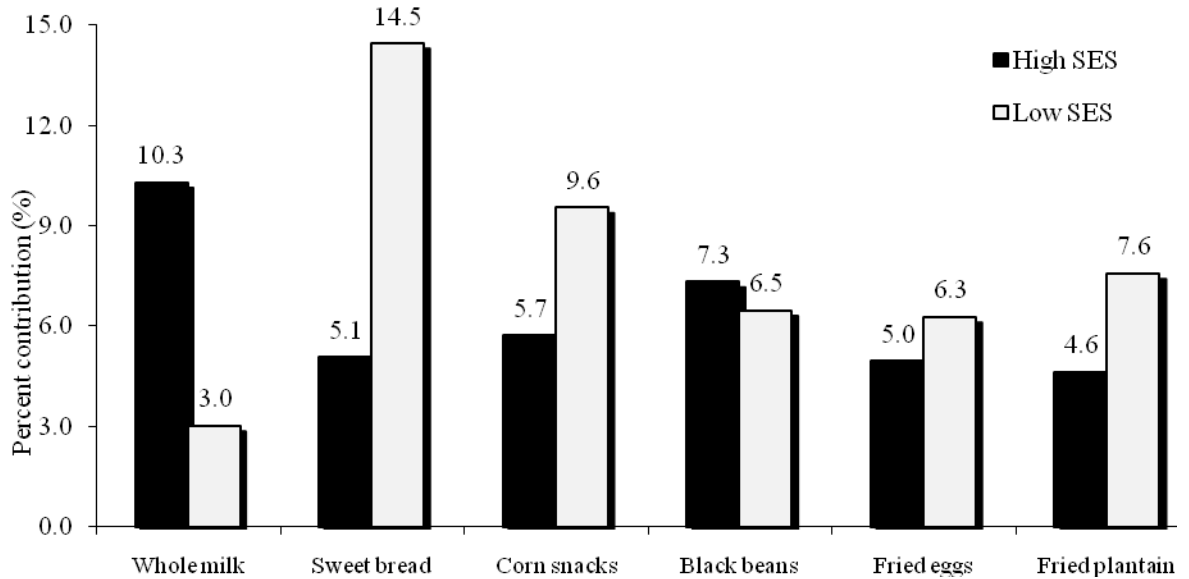

**Panel B. Main Sources of n-3 FA in girls**

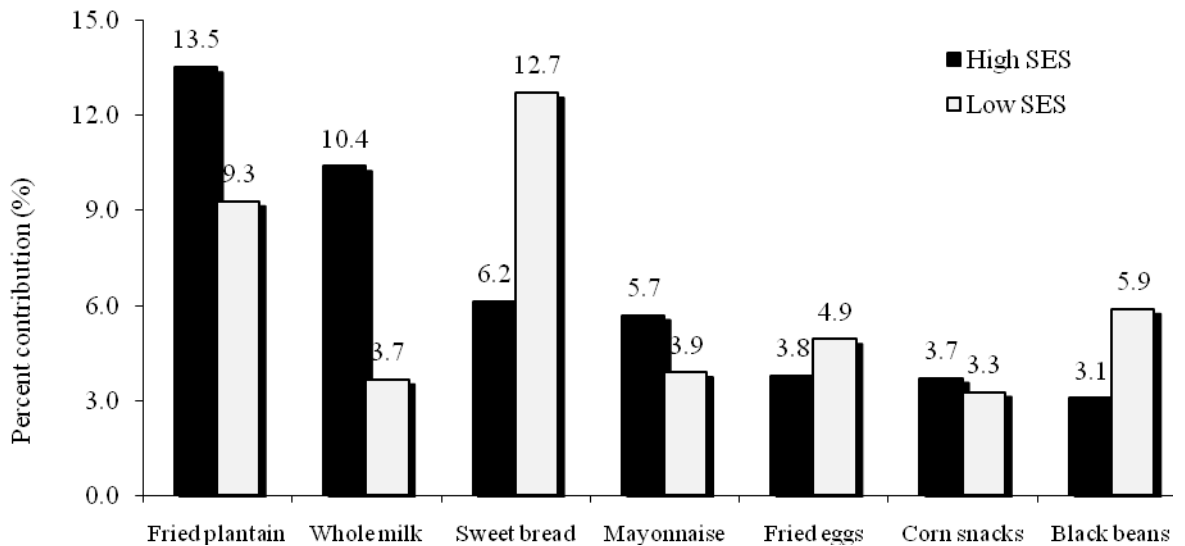

Supplement: MOESM1 [file 25654766]
